# Supplementary material
Source: PubMed Central journal article supplement (PMC6660423)
Supplement: NIHMS1023155-supplement-1.pdf [file NIHMS1023155-supplement-1.pdf]

**Supplementary table:** Observed to expected mortality ratios for all surgery centers over time (indicated by STS data version) before and after the exclusion of salvage patients.

| Center | With or w/out Salvage | N    | Data Version |      |      |      |      |
|--------|-----------------------|------|--------------|------|------|------|------|
|        |                       |      | 2.41         | 2.52 | 2.61 | 2.73 | 2.81 |
| 1      | with                  | 5967 | 0.83         | 1.19 | 1.83 | 2.08 | 1.61 |
|        | w/out                 | 5958 | 0.71         | 1.19 | 1.85 | 2.08 | 1.60 |
| 2      | with                  | 2381 | 1.23         | 0.62 | 1.16 | 1.11 | 1.20 |
|        | w/out                 | 2379 | 1.16         | 0.62 | 1.16 | 1.11 | 1.14 |
| 3      | with                  | 2421 | 2.13         | 0.75 | 1.56 | 1.01 | 1.34 |
|        | w/out                 | 2414 | 2.14         | 0.69 | 1.50 | 1.01 | 1.34 |
| 4      | with                  | 3312 | 1.40         | 1.53 | 1.40 | 1.18 | 1.04 |
|        | w/out                 | 3302 | 1.43         | 1.63 | 1.38 | 1.18 | 1.03 |
| 5      | with                  | 3710 | -            | -    | -    | 1.06 | 0.67 |
|        | w/out                 | 3705 | -            | -    | -    | 1.06 | 0.64 |
| 6      | with                  | 1949 | 0.38         | 0.86 | 1.87 | 0.73 | 1.01 |
|        | w/out                 | 1949 | 0.38         | 0.86 | 1.87 | 0.73 | 1.01 |
| 7      | with                  | 3303 | 0.62         | 1.32 | 1.24 | 0.43 | 1.02 |
|        | w/out                 | 3297 | 0.67         | 1.34 | 1.27 | 0.43 | 1.07 |
| 8      | with                  | 614  | -            | -    | -    | 1.12 | 1.24 |
|        | w/out                 | 614  | -            | -    | -    | 1.12 | 1.24 |
| 9      | with                  | 3980 | 1.28         | 1.15 | 1.50 | 1.13 | 0.51 |
|        | w/out                 | 3964 | 1.16         | 1.22 | 1.48 | 1.11 | 0.52 |
| 10     | with                  | 2859 | 0.68         | 0.63 | 1.15 | 0.30 | 0.72 |
|        | w/out                 | 2858 | 0.62         | 0.63 | 1.15 | 0.30 | 0.72 |
| 11     | with                  | 2088 | 0.56         | 0.69 | 1.56 | 1.22 | 1.34 |
|        | w/out                 | 2088 | 0.56         | 0.69 | 1.56 | 1.22 | 1.34 |
| 12     | with                  | 1294 | 0.70         | 0.96 | 0.26 | 1.11 | 0.85 |
|        | w/out                 | 1290 | 0.49         | 0.81 | 0.26 | 0.99 | 0.85 |
| 13     | with                  | 1035 | -            | 1.83 | 0.89 | 1.40 | 0.40 |

|     |       |       |      |      |      |      |      |
|-----|-------|-------|------|------|------|------|------|
|     | w/out | 1034  | -    | 1.83 | 0.89 | 1.40 | 0.40 |
| 14  | with  | 5960  | 0.70 | 0.34 | 0.79 | 0.88 | 0.85 |
|     | w/out | 5955  | 0.70 | 0.35 | 0.79 | 0.89 | 0.85 |
| 15  | with  | 3158  | 1.09 | 1.03 | 1.73 | 0.75 | 1.36 |
|     | w/out | 3157  | 1.09 | 1.03 | 1.73 | 0.70 | 1.36 |
| 16  | with  | 11693 | 0.59 | 0.49 | 1.36 | 1.04 | 1.06 |
|     | w/out | 11684 | 0.57 | 0.47 | 1.35 | 1.05 | 1.04 |
| 17  | with  | 10315 | 0.67 | 0.78 | 1.22 | 1.10 | 0.63 |
|     | w/out | 10280 | 0.63 | 0.76 | 1.20 | 1.09 | 0.63 |
| 18  | with  | 4190  | 0.81 | 0.94 | 1.27 | 0.90 | 0.76 |
|     | w/out | 4184  | 0.81 | 0.96 | 1.27 | 0.90 | 0.76 |
| 19  | with  | 6268  | 0.65 | 0.85 | 0.89 | 0.62 | 0.61 |
|     | w/out | 6268  | 0.65 | 0.85 | 0.89 | 0.62 | 0.61 |
| all | with  | 76497 | 0.79 | 0.84 | 1.24 | 1    | 0.89 |
|     | w/out | 76380 | 0.75 | 0.8  | 1.24 | 0.98 | 0.87 |
